# Supplementary material
Source: PubMed Central journal article supplement (PMC3059597)
Supplement: mmc1.pdf [file mmc1.pdf]

# **Keratocyte Lamellipodial Protrusion Is Characterized by a Concave Force-Velocity Relation**

Fabian Heinemann,<sup>†‡</sup> Holger Doschke,<sup>†</sup> and Manfred Radmacher<sup>†\*</sup>

<sup>†</sup>Biophysics Institute, University of Bremen, Otto-Hahn Allee, Bremen, Germany; and <sup>‡</sup>Biotechnologisches Zentrum, Dresden University of Technology, Tatzberg Dresden, Germany

## **Supporting material labels:**

### **Supporting movie 1:**

Video of a keratocyte migrating against a glass fibre positioned directly (~20nm) above the surface. A laser beam was coupled into the glass fibre, allowing to observe the deflection of the fibre on a segmented photo detector. Initially the lamellipodium deflects the fibre, followed by the cell body. Finally the cell has passed through the fibre and the fibre jumps back to origin.

### **Supporting movie 2:**

Video of a keratocyte migrating against a glass fibre positioned directly (~20nm) above the surface. Several seconds after initial contact with the lamellipodium, the cell is retracted from the fibre such, that the lamellipodium touches the fibre a second time at the same location. This experiment was performed to test for an adaption of the lamellipodial actin network as a response to the applied force during the initial contact with the fibre.
